# Supplementary material
Source: publisher figshare collection journal article supplement (https://tandf.figshare.com/articles/dataset/_/12417533)
Supplement: Supplementary file 1 [file 4]

## List of railway stations' names presented on the map

| Current station's name              | Station's name in 1914                  |
|-------------------------------------|-----------------------------------------|
| Bełżec                              | Bełżec                                  |
| Bielsko-Biała Główna                | Bielitz                                 |
| Bílovec                             | Wagstadt                                |
| Bohumín                             | Oderberg                                |
| Bruntál                             | Freudenthal                             |
| Český Těšín                         | Teschen                                 |
| Chabówka                            | Chabówka                                |
| Chybie                              | Chybi                                   |
| Cieszyn                             | Teschen-Boberthal                       |
| Czechowice-Dziedzice                | Dzieditz                                |
| Dębica                              | Dębica                                  |
| Dynów                               | Dynów                                   |
| Goleszów                            | Golleschau                              |
| Gorlice                             | Gorlice                                 |
| Gorlice Zagórzany                   | Zagórzany                               |
| Hradec nad Moravicí                 | Grätz                                   |
| Jasło                               | Jasło                                   |
| Javorník ve Slezsku                 | Jauernig                                |
| Jaworzno Szczakowa                  | Szczakowa                               |
| Jindřichov ve Slezsku               | Hennersdorf in österreichisch Schlesien |
| Kalwaria Zebrzydowska<br>Lanckorona | Kalwarya                                |
| Kraków Bieżanów                     | Bierzanów                               |
| Kraków Bonarka                      | Podgórze-Bonarka                        |
| Kraków Główny                       | Krakau                                  |
| Kraków Płaszów                      | Podgórze-Płaszów                        |
| Krnov                               | Jägerndorf                              |
| Krynica Zdrój                       | Krynica                                 |
| Lipová Lázně                        | Nieder Lindewiese                       |
| Lubaczów                            | Lubaczów                                |
| Łupków                              | Łupków                                  |
| Majdan                              | Majdan                                  |
| Malá Morávka                        | Klein Mohrau-Karlsdorf                  |
| Mikulovice                          | Niklasdorf                              |
| Milotice nad Opavou                 | Erbersdorf-Milkendorf                   |
| Munina                              | Munina                                  |
| Muszyna                             | Muszyna                                 |
| Nowy Sącz                           | Neu Sandec                              |
| Nowy Targ                           | Nowy Targ                               |
| Opava východ                        | Troppau Nordbahnhof                     |
| Osoblaha                            | Hotzenplotz                             |

|                       |                                        |
|-----------------------|----------------------------------------|
| Ostrava-Svinov        | Mährisch Ostrau-Oderfurt               |
| Oświęcim              | Oświęcim                               |
| Petrovice u Karviné   | Petrowitz in österreichisch Schlesien  |
| Przemyśl Główny       | Przemyśl                               |
| Przeworsk             | Przeworsk                              |
| Rzeszów Główny        | Rzeszów                                |
| Rzeszów Staroniwa     | Rzeszów-Staroniwa                      |
| Skawina               | Skawina                                |
| Sobów                 | Sobów                                  |
| Spytkowice            | Spytkowice                             |
| Stalowa Wola Rozwadów | Rozwadów                               |
| Stróże                | Stróże                                 |
| Strumień              | Schwarzwasser                          |
| Studénka              | Stauding                               |
| Sucha Beskidzka       | Sucha                                  |
| Svatoňovice           | Schwansdorf                            |
| Svobodné Heřmanice    | Freihermersdorf                        |
| Szczucin              | Szczucin                               |
| Tarnów                | Tarnów                                 |
| Třemešná ve Slezsku   | Röwersdorf                             |
| Trzebinia             | Trzebinia                              |
| Ustroń                | Ustron                                 |
| Velká Kraš            | Haugsdorf in österreichisch Schlesien  |
| Vidnava               | Weidenau in österreichisch Schlesien   |
| Vrbno pod Pradědem    | Würbenthal                             |
| Wadowice              | Wadowice                               |
| Wieliczka Park        | Wieliczka                              |
| Zagórz                | Zagórz                                 |
| Zakopane              | Zakopane                               |
| Zlaté Hory            | Zuckmantel in österreichisch Schlesien |
| Zwardoń               | Zwardoń                                |
| Żywiec                | Żywiec                                 |
| Березовиця-Острів     | Berezowica-Ostrów                      |
| Біла-Чортківська      | Biała Czortkowska                      |
| Бірки-Великі          | Borki Wielkie                          |
| Борислав              | Borysław-Tustanowice                   |
| Броди                 | Brody                                  |
| Вовків                | Wołków                                 |
| Вигнанка              | Wygnanka                               |
| Вигода                | Wygoda                                 |
| Ворохта               | Worochta                               |
| Галич                 | Halicz                                 |
| Гримайлів             | Grzymałów                              |
| Гусятин               | Husiatyn                               |
| Долина                | Dolina                                 |
| Дрогобич              | Drohobycz                              |

|                  |                  |
|------------------|------------------|
| Заліщики         | Zaleszczyki      |
| Збараж           | Zbaraż           |
| Злочів           | Złoczów          |
| Іване-Пусте      | Iwanie Puste     |
| Івано-Франківськ | Stanislau        |
| Коломия          | Kolomea          |
| Красне           | Krasne           |
| Лавочне          | ławoczne         |
| Ланчин           | łanczyn          |
| Львів            | Lemberg          |
| Підгайці         | Podhajce         |
| Підволочиськ     | Podwołoczyska    |
| Потутори         | Potutory         |
| Рава Руська      | Rawa Ruska       |
| Самбір           | Sambor           |
| Скала-Подільська | Skała            |
| Сокаль           | Sokal            |
| Стоянів          | Stojanów         |
| Стрий            | Stryj            |
| Сянки            | Sianki           |
| Тересин          | Teresin          |
| Тернопіль        | Tarnopol         |
| Тлумач           | Tłumacz          |
| Трускавець       | Truskawiec       |
| Хирів            | Chyrów           |
| Хирів-Посада     | Posada Chyrowska |
| Ходорів          | Chodorów         |
| Яворів           | Jaworów          |
