# Supplementary material
Source: publisher figshare collection journal article supplement (https://tandf.figshare.com/articles/dataset/_/12417533)

# Railway network of Galicia and Austrian Silesia 1847 - 1914

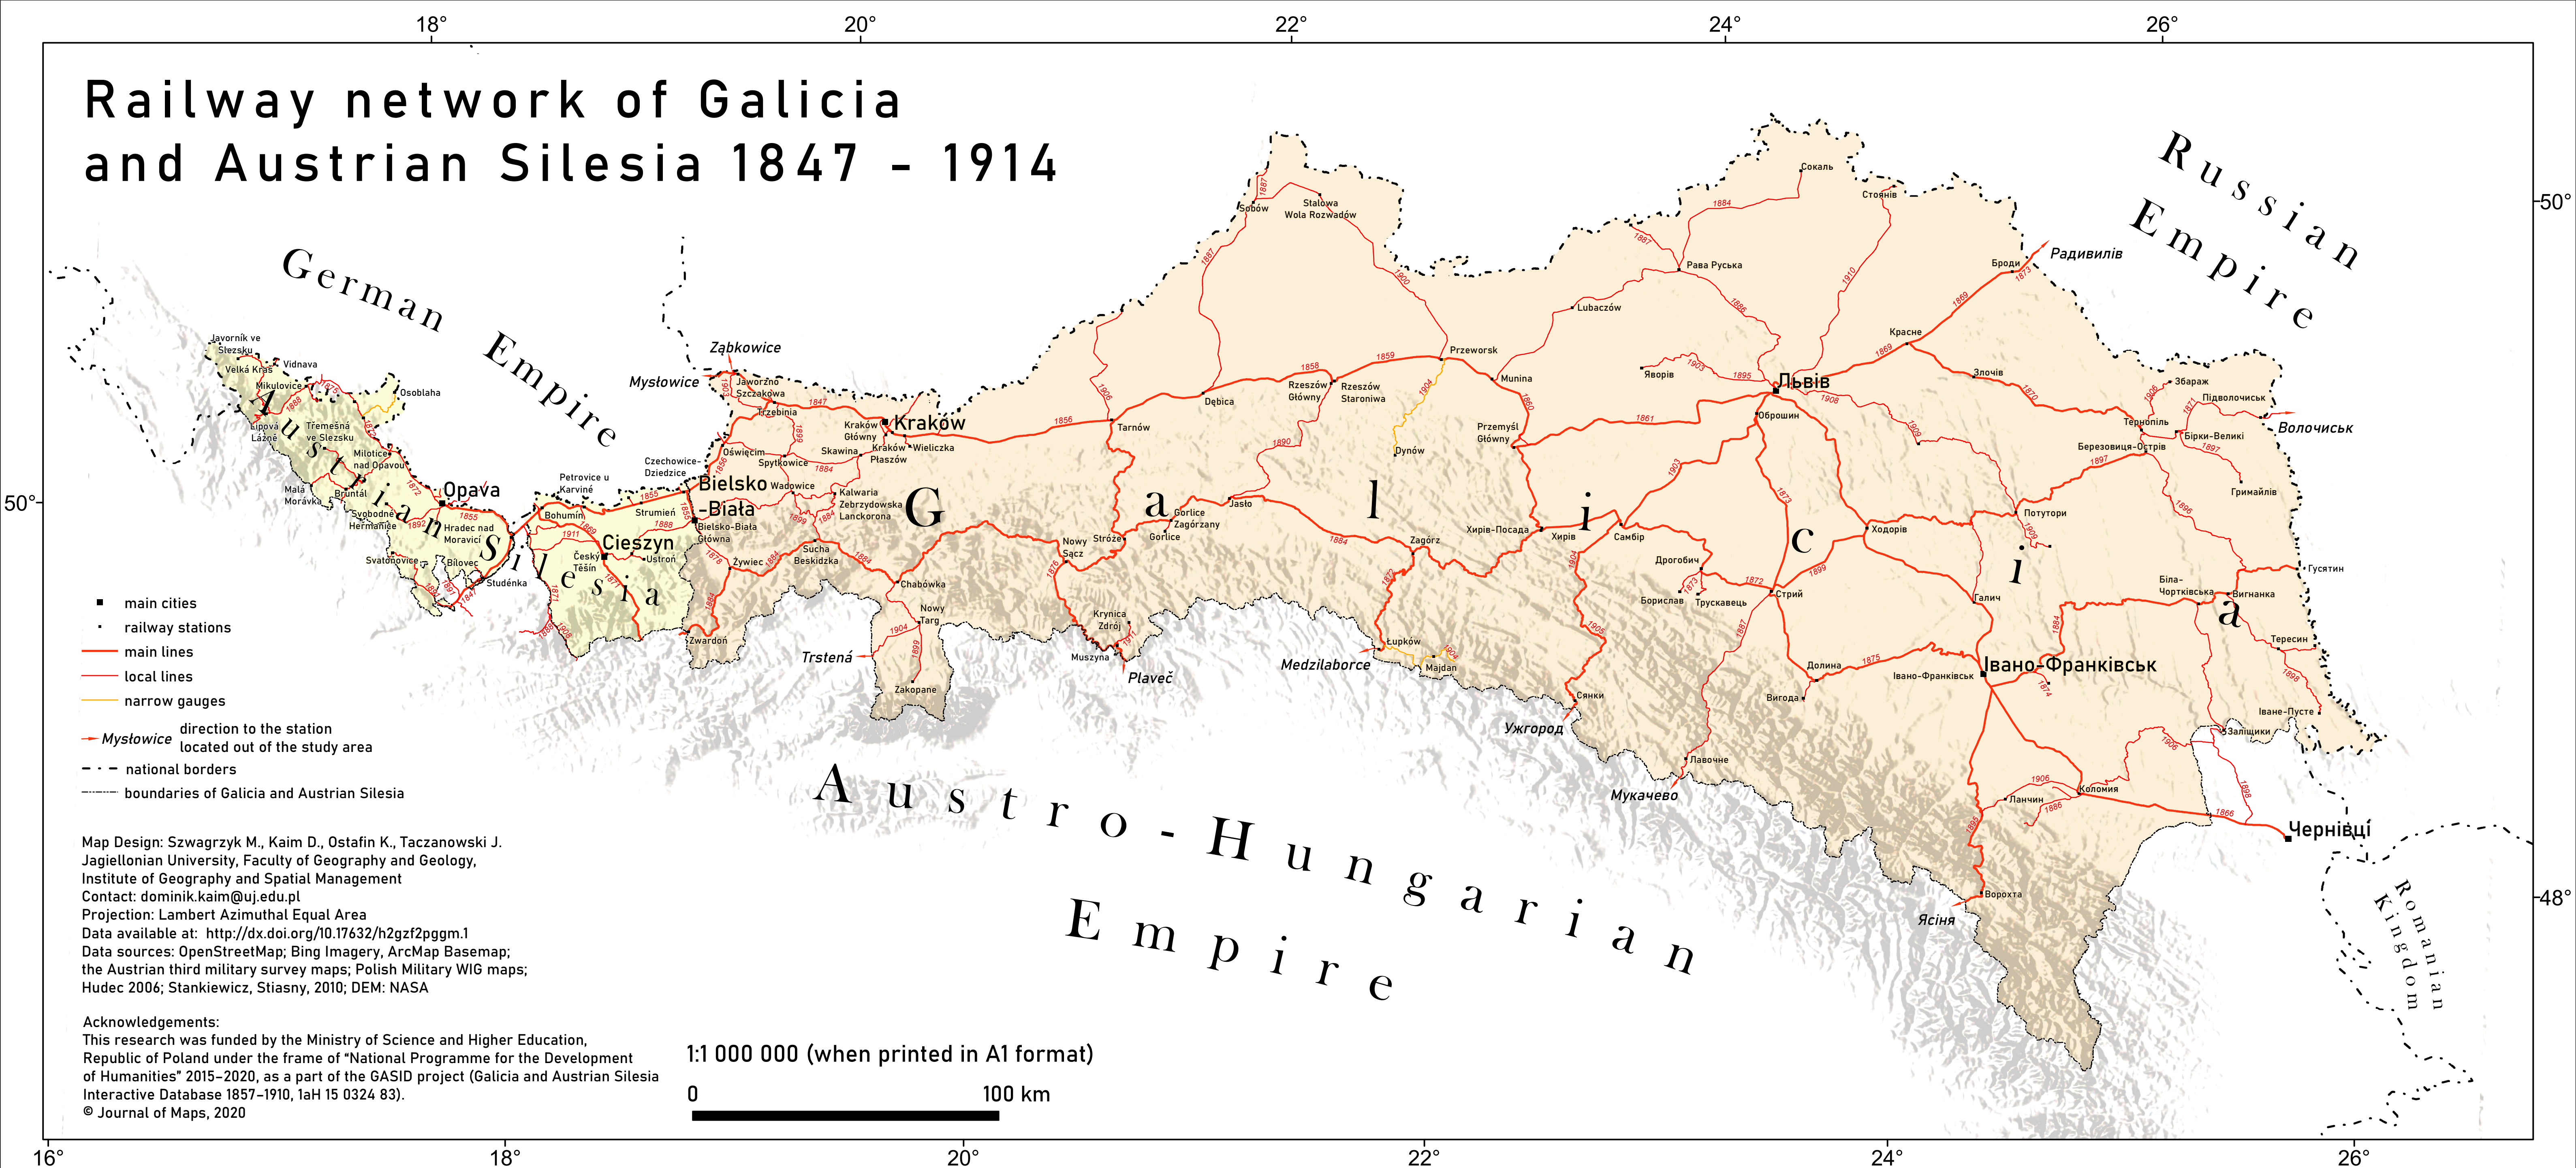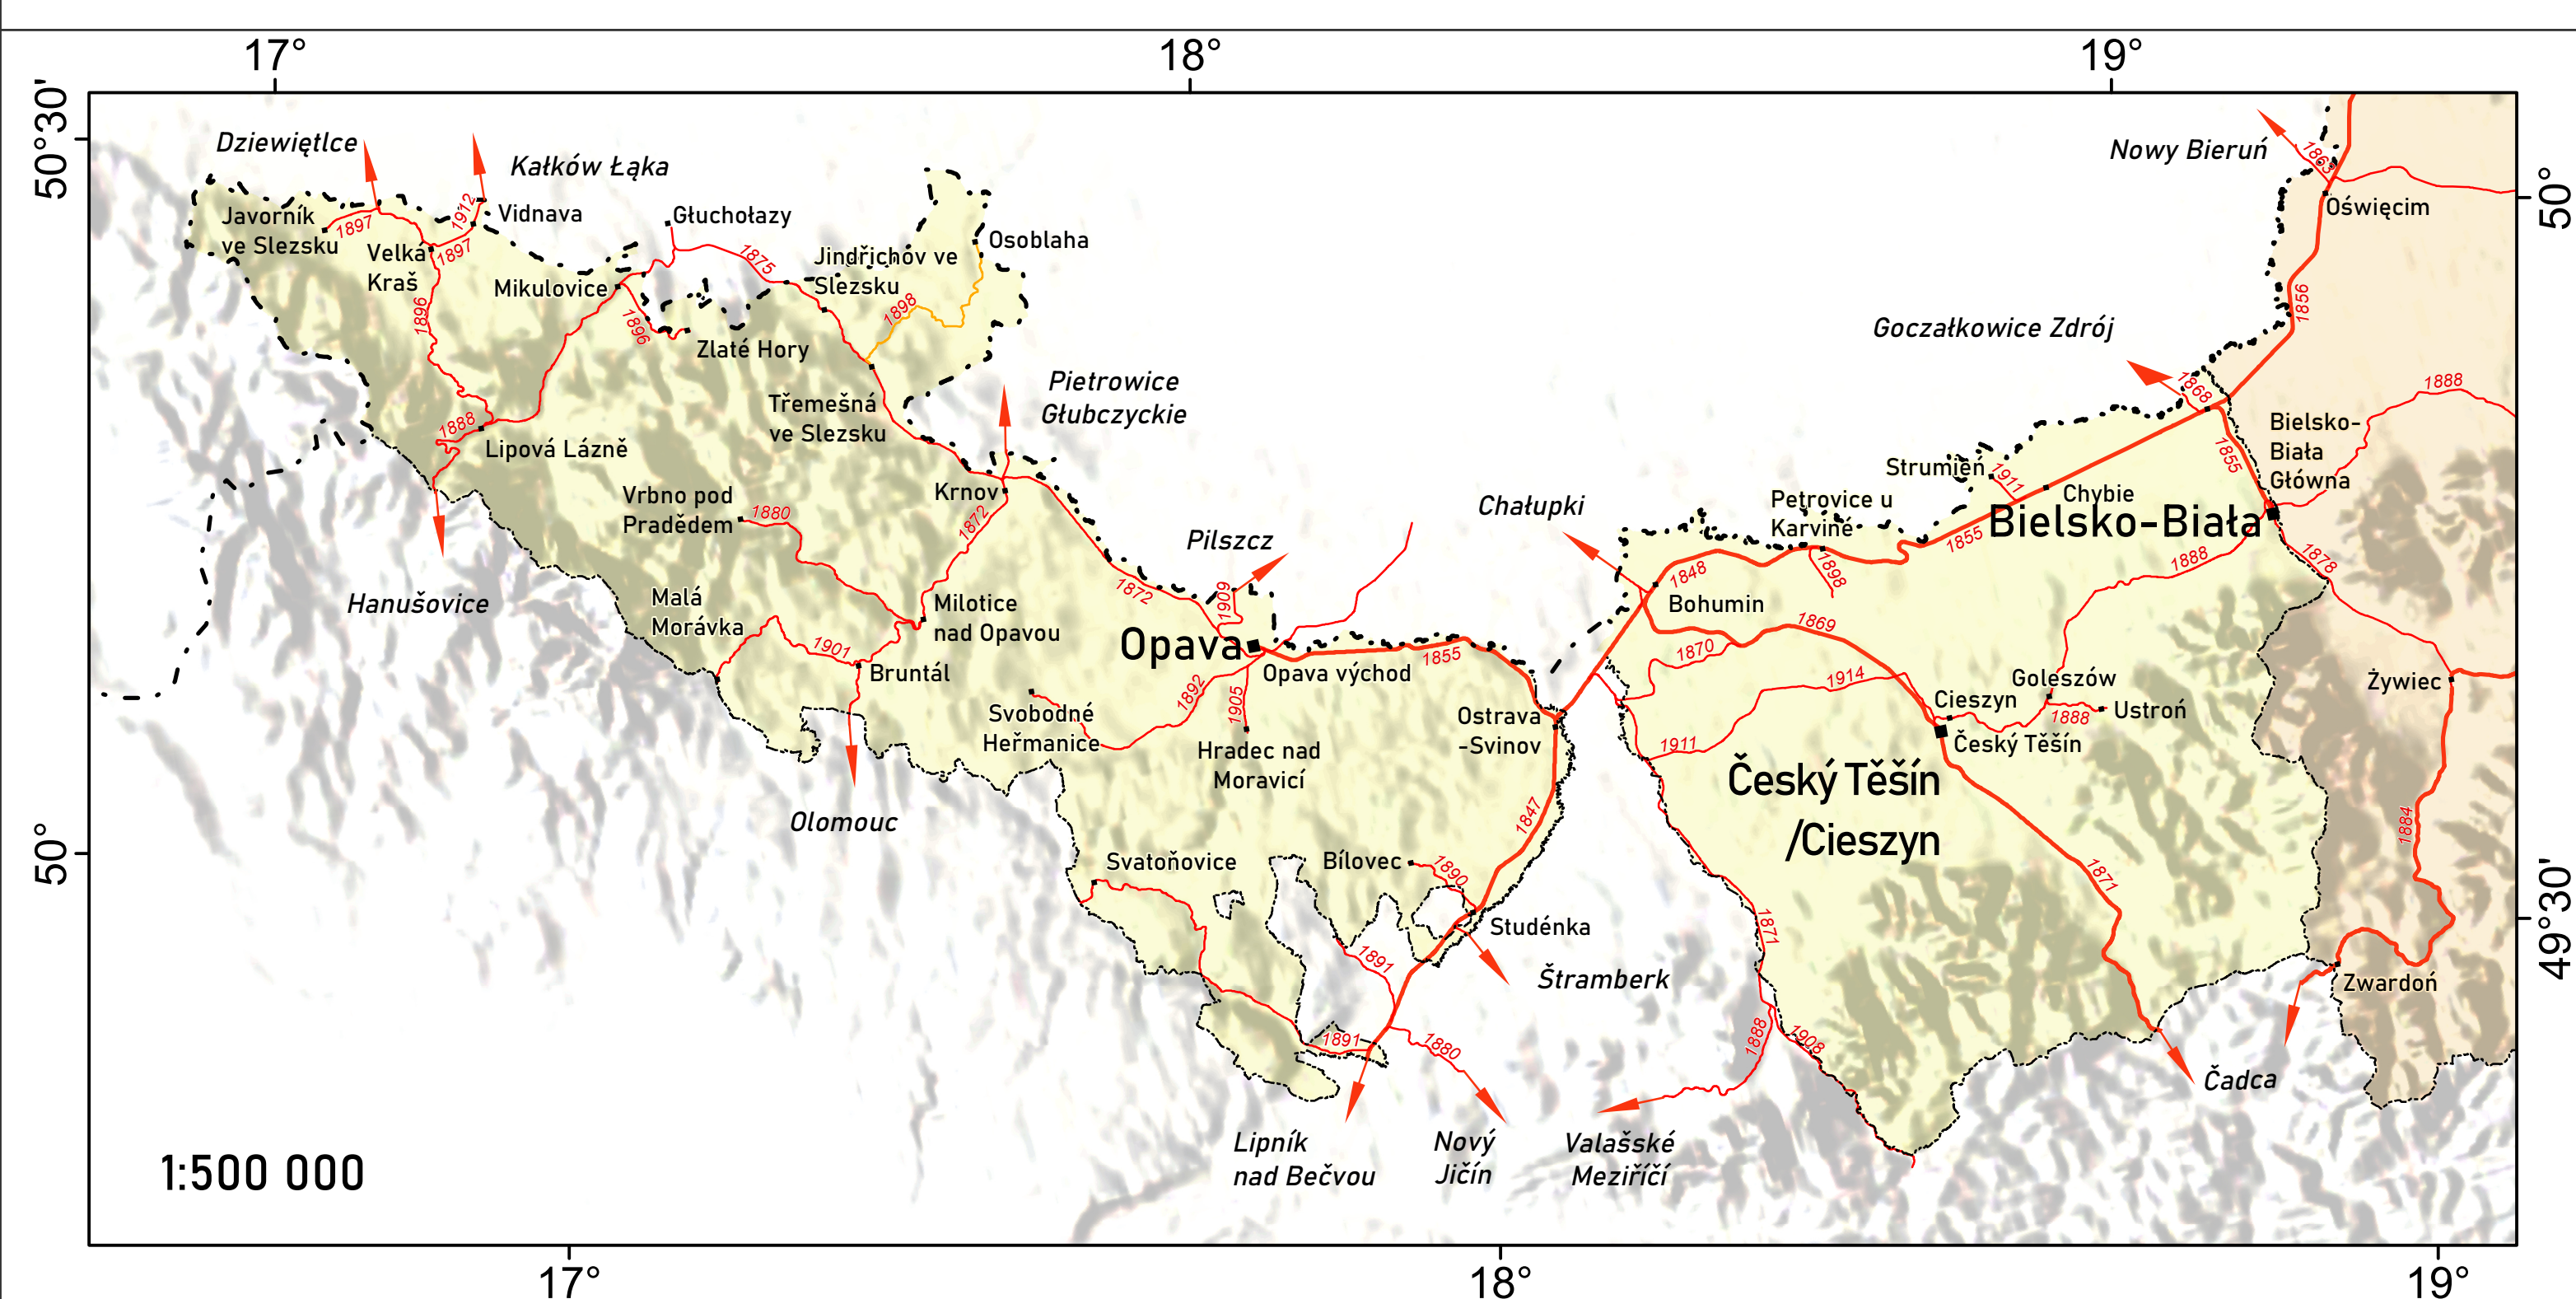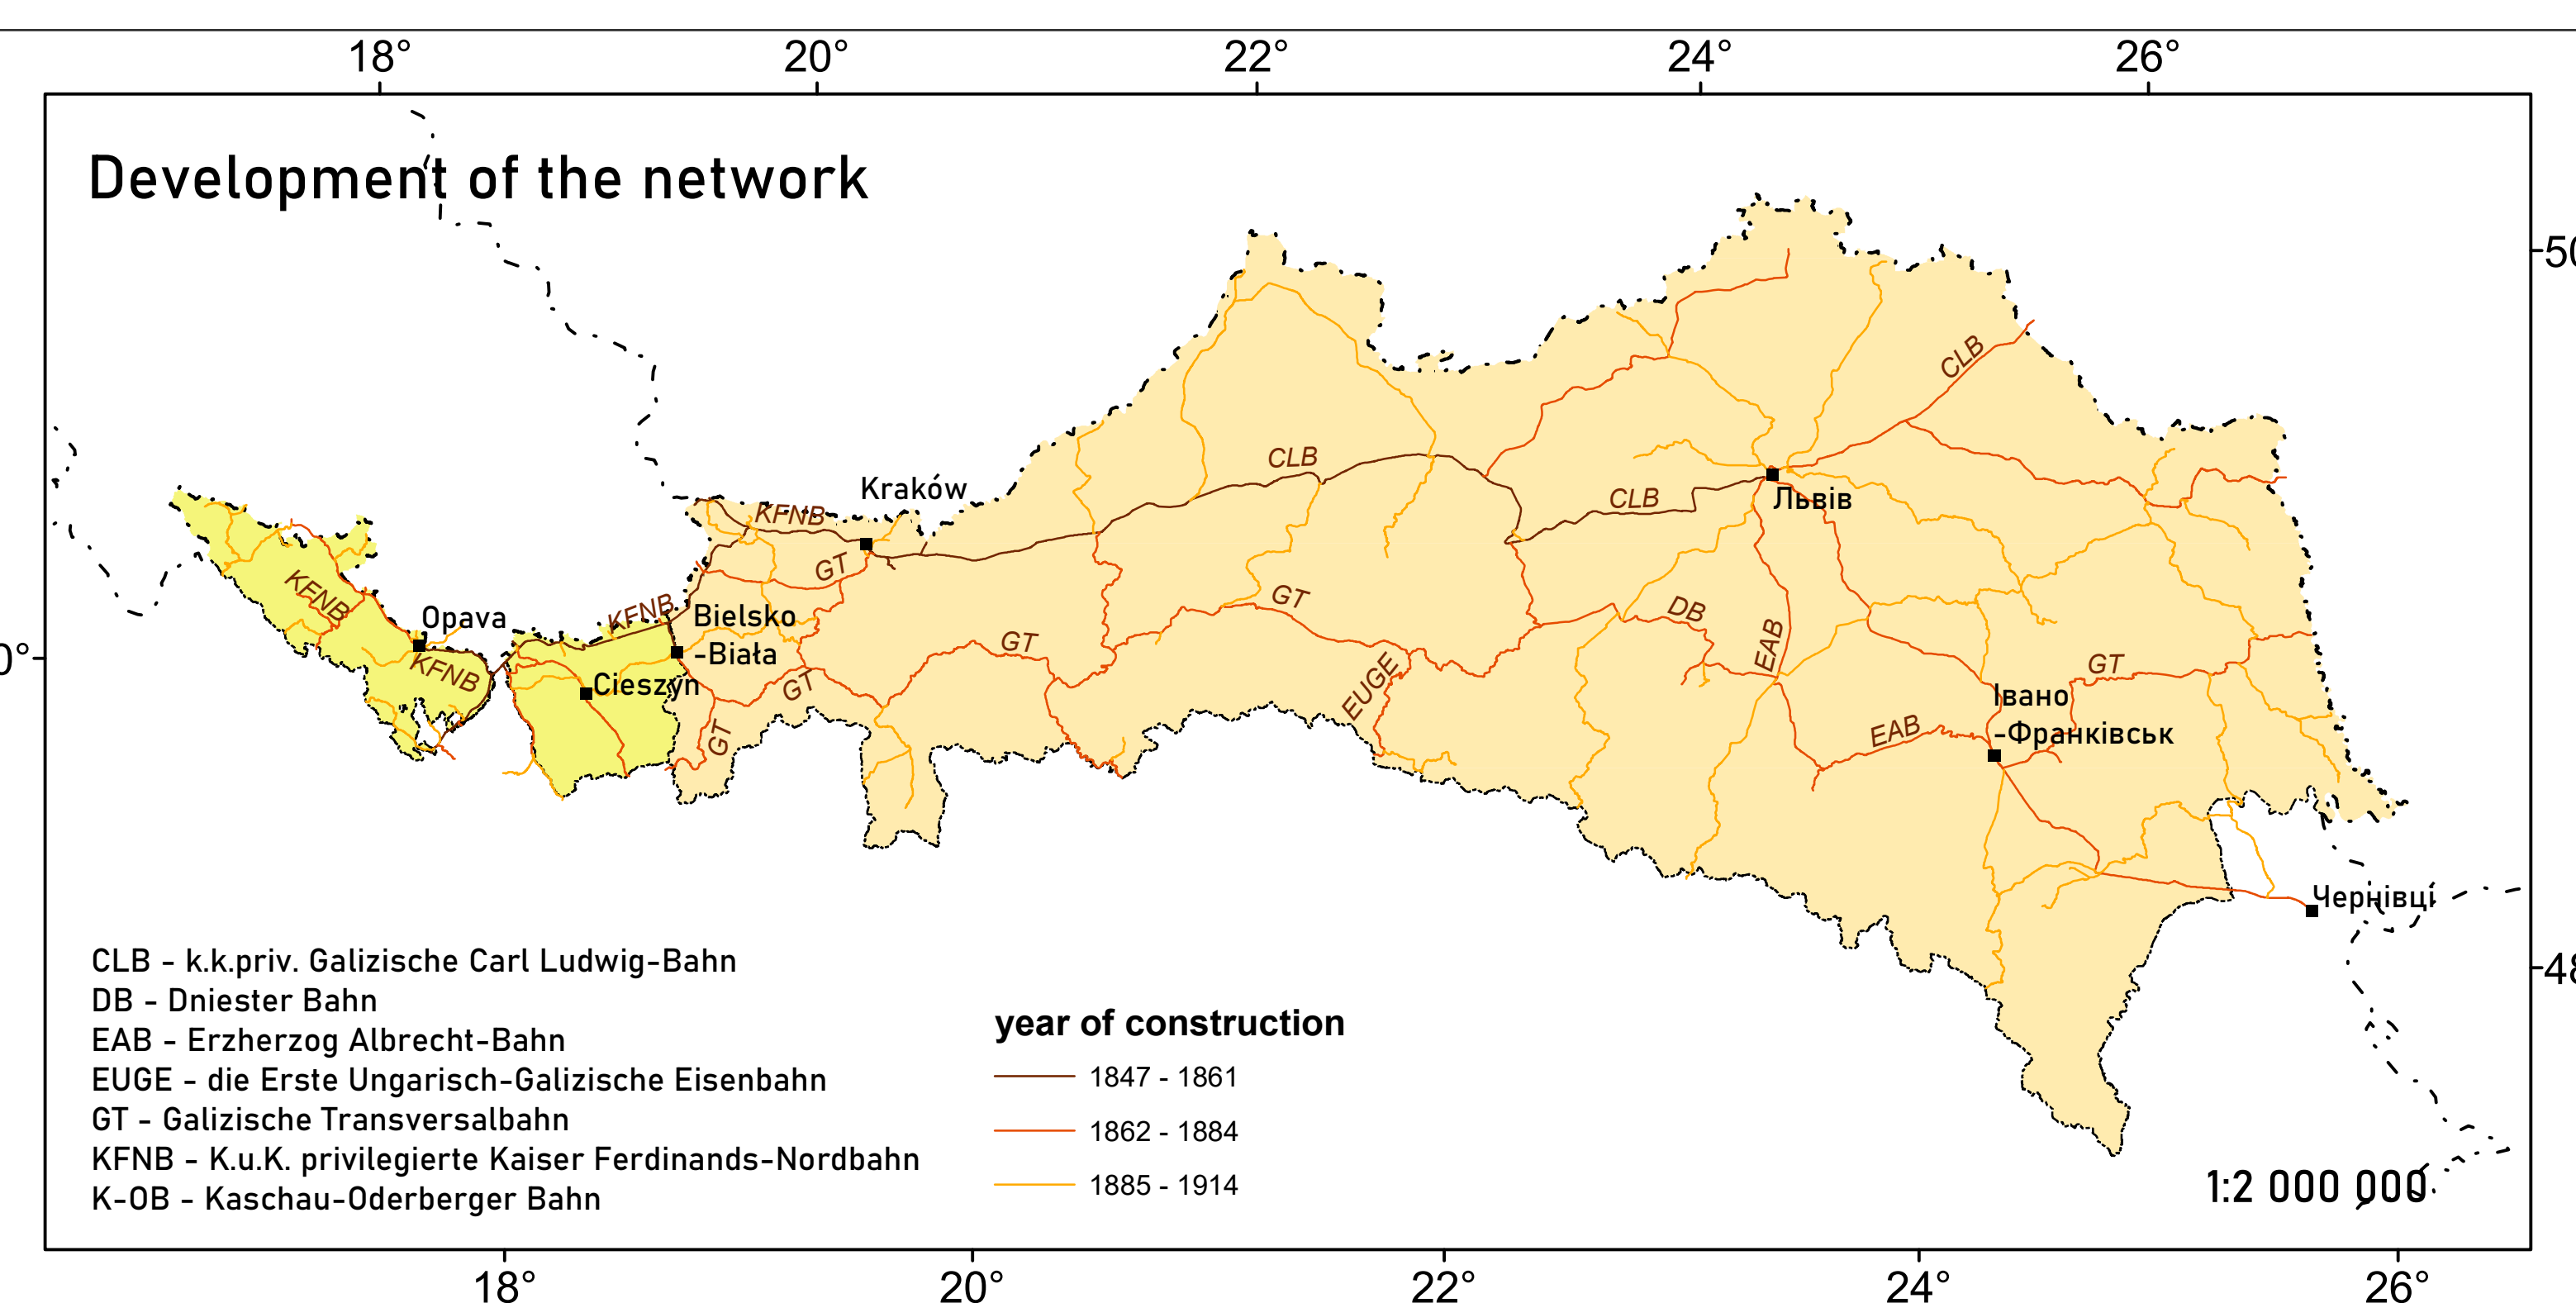

Supplement: Supplementary file 2 [file 4]
